# Supplementary material for: Improved power conversion efficiency of perovskite solar cells using highly conductive WOx doped PEDOT:PSS
Source: Royal Society of Chemistry journal article supplement (doi:10.1039/c8nj04131h), 2018-01-01
Supplement: c8nj04131h1.pdf [file c8nj04131h1.pdf]

Supporting Information

**Improved Power Conversion Efficiency of Perovskite Solar Cells using Highly Conductive WO<sub>x</sub> doped PEDOT:PSS**

Anil Kanwat, V., Sandhya Rani, Jin Jang\*

Advanced Display Research Center, Department of Information Display, Kyung Hee University, Hoegi-dong, Dongdaemun-gu, Seoul 130-701, South Korea

Email: [jjang@khu.ac.kr](mailto:jjang@khu.ac.kr)

**Table S1.** Summary of PEDOT:PSS treated thin films in the literature.

| Ref. #    | Solvent                        | Sheet Resistance (/sq) | Transmittance (%) @ 550 nm | Conductivity (S/cm) | Treatment type |
|-----------|--------------------------------|------------------------|----------------------------|---------------------|----------------|
| 1         | DMSO                           |                        | 80                         | 389                 | Doping         |
| 1         | EG                             | 450                    | 90                         | 634                 | Doping         |
| 1         | DMSO                           |                        | 85                         | 700                 | Post treatment |
| 1         | EG                             | 65                     | 75                         | 1418                | Post treatment |
| 2         | H <sub>2</sub> SO <sub>4</sub> | 67                     | 87                         | 3065                | Post treatment |
| 3         | H <sub>3</sub> PO <sub>4</sub> | 120                    | 80                         | 1460                | Post treatment |
| 4         | H <sub>2</sub> SO <sub>4</sub> | 45                     | 90                         | 4300                | Post treatment |
| This work | EG                             | 25                     | 90                         | 3000                | Post treatment |
|           | EG                             | 35                     | 95                         | 1920                | Post treatment |

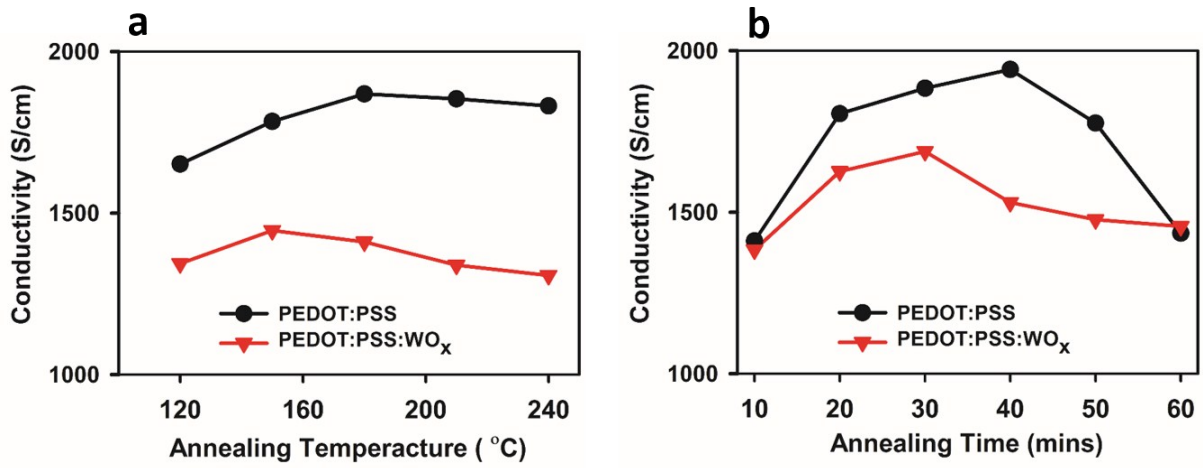

Figure S1. Effect of EG treatment on conductivity of single layered PEDOT:PSS (50nm thick) and PEDOT:PSS:WO<sub>x</sub> (40 nm thick) with (a) annealing temperature (a) and annealing time.

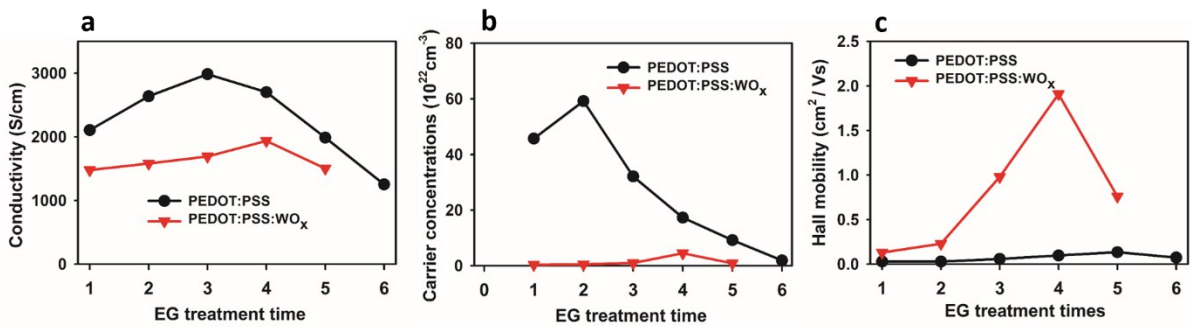

Figure S2. (a) Conductivity, (b) carrier concentrations, and (c) mobility of multiple EG treated on multiple layered of PEDOT:PSS/PEDOT:PSS:WO<sub>x</sub> thin films measured by Hall effect.

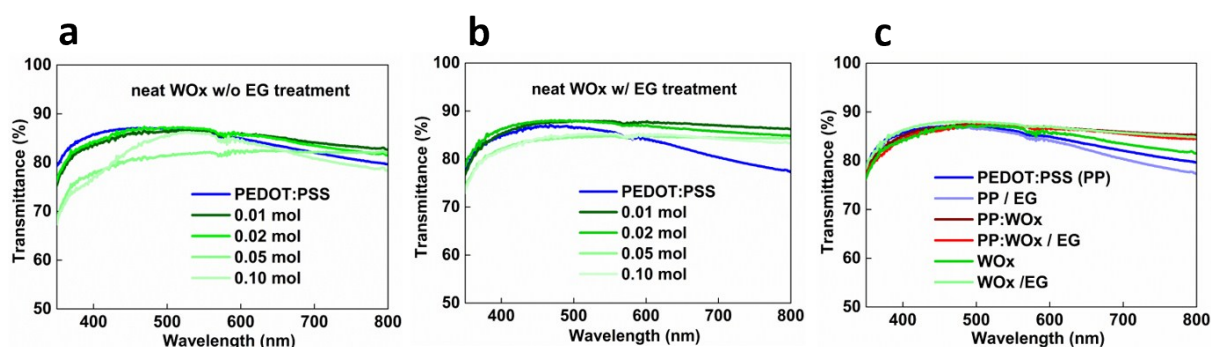

Figure S3. Transmittance plots of (a) neat sol-gel processed  $\text{WO}_x$  thin films, (b) neat sol-gel processed  $\text{WO}_x$  thin films after EG treatment, and (c) comparison of w/ and w/o EG treated thin films of PEDOT:PSS,  $\text{WO}_x$  doped PEDOT:PSS and neat  $\text{WO}_x$  thin films.

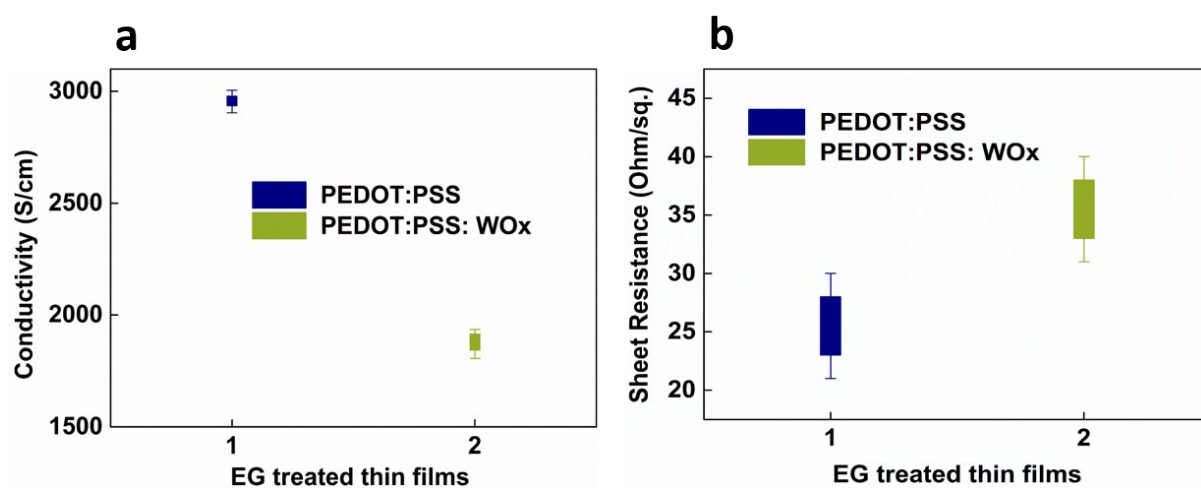

Figure S4. (a) Conductivity and (b) sheet resistance mean deviations of PEDOT:PSS/PEDOT:PSS: $\text{WO}_x$  of 10 samples. EG treatment carried out on each layers of multiple layered (180 nm thick 4 layers of PEDOT:PSS, and 160 nm thick 3 layers of PEDOT:PSS: $\text{WO}_x$ ).

1. Xia, K. Sun, J. Ouyang, *Adv. Mater.* 2012, 24, 2436.
2. N. Kim, H. Kang, J. H. Lee, S. Kee, S. H. Lee, and K. Lee, *Adv. Mater.* 2015, 27, 2317–2323.
3. W. Meng, R. Ge, Z. Li, J. Tong, T. Liu, Q. Zhao, S. Xiong, F. Jiang, L. Mao, Y. Zhou, *ACS Appl. Mater. Interfaces* 2015, 7, 14089–14094.
4. Y. H. Kim, C. Sachse, M. L. Machala, C. May, L. M. Meskamp, K. Leo, *Adv. Funct. Mater.* 2011, 21, 1076–1081.
